# Supplementary material
Source: PubMed Central journal article supplement (PMC3619618)
Supplement: NIHMS181448-supplement-1_si_001.pdf [file NIHMS181448-supplement-1_si_001.pdf]

## Supporting Information for

Synthesis of Odd Generation Triazine Dendrimers Using a Divergent,  
Macromonomer Approach

Jongdoo Lim, Meredith A. Mintzer, Lisa M. Perez, and Eric E. Simanek\*

Department of Chemistry, Texas A&amp;M University, College Station TX 77843

## Table of Contents

|                              | Page |
|------------------------------|------|
| Computational Details.....   | S2   |
| MALDI-TOF MS Protocol.....   | S3   |
| General Procedures.....      | S4   |
| Experimental Procedures..... | S4   |
| Spectra.....                 | S7   |

## Computational Details

Computational results were obtained using the software package Materials Studio (MS) 5.0 (Accelrys, Inc). The dendrimers were built in an extended conformation using the dendrimer builder tools in MS. The conformational space of each dendrimer was sampled via 300 Simulated Annealing (SA) cycles over a period of 840 ps using the Forcite Plus program and the polymer consistent force-field (pcff) as implemented in MS 5.0. The SA runs utilized constant volume and temperature (NVT) molecular dynamics (MD) over a temperature range of 300-1000 K using the Nosé thermostat,  $\Delta T = 50\text{K}$ , untruncated atom-based electrostatic and van der Waals interactions, and a time step of 1 fs. The dendrimer was minimized after each annealing cycle, resulting in 300 minimized structures per dendrimer.

**MALDI-TOF MS Protocol**

|                        |                                                                                  |
|------------------------|----------------------------------------------------------------------------------|
| Instrument:            | Applied Biosystems Voyager STR                                                   |
| Mode of operation:     | Reflector for molecular weight >5 kDa<br>Linear for molecular weight above 5 kDa |
| Extraction mode:       | Delayed                                                                          |
| Polarity:              | Positive                                                                         |
| Accelerating voltage:  | 20000 V                                                                          |
| Grid voltage:          | 65%                                                                              |
| Mirror voltage ratio:  | 1.12                                                                             |
| Guide wire:            | 0.002%                                                                           |
| Extraction delay time: | 275 nsec                                                                         |
| Number of laser shots: | 100/spectrum                                                                     |
| Laser Rep Rate:        | 3.0 Hz                                                                           |
| Sample concentration:  | roughly 0.1 mg/ml                                                                |
| Matrix:                | 2',4',6'-Trihydroxyacetophenone monohydrate (THAP)<br>Concentration 20 mg/ml     |

Matrix:Analyte ratio (1:1 v/v), 1 $\mu$ l of the matrix and sample mixture was spotted on a stainless steel MALDI plate.

## General Procedures

**Di(Boc-piperazyl) monochlorotriazine (pip-MCT)** was synthesized by the method of Simanek, et al.<sup>S1</sup> Other chemicals were purchased from Aldrich and Acros and used without further purification. All solvents were ACS grade and used without further purification. NMR spectra were recorded on a Varian Mercury 300 MHz or Inova 300 MHz spectrometer in CDCl<sub>3</sub>. All mass spectral analyses were carried out by the Laboratory for Biological Mass Spectrometry at Texas A&M.

## Experimental Procedures

**Compound 1.** A solution of di(Boc-piperazyl) monochlorotriazine (5.0 g, 10.33 mmol), 4,7,10-trioxa-1,13-tridecanediamine (15.0 g, 68.09 mmol), and DIPEA (3.0 mL, 17.1 mmol) in THF (100 mL) was stirred for 3 h at room temperature and then refluxed for 20 h. The solution was evaporated under vacuum. The residue was dissolved in dichloromethane, washed with brine, dried over MgSO<sub>4</sub>, filtered, and evaporated under vacuum. The crude product was purified by silica gel chromatography (from DCM:MeOH = 47:3 to DCM:MeOH = 7:1 w/ 1% NH<sub>4</sub>OH) to give **1** (5.8 g, 84%) as a white solid. <sup>1</sup>H NMR (300 MHz, CDCl<sub>3</sub>) δ 3.67 (br, 8H, NCH<sub>2</sub>CH<sub>2</sub>NBoc), 3.60-3.49 (m, 12H, CH<sub>2</sub>OCH<sub>2</sub>CH<sub>2</sub>OCH<sub>2</sub>CH<sub>2</sub>OCH<sub>2</sub>), 3.37 (br, 10H, NHCH<sub>2</sub>CH<sub>2</sub>CH<sub>2</sub>O, NCH<sub>2</sub>CH<sub>2</sub>NBoc), 2.74 (t, 2H, OCH<sub>2</sub>CH<sub>2</sub>CH<sub>2</sub>NH<sub>2</sub>), 1.78 (m, 2H, OCH<sub>2</sub>CH<sub>2</sub>CH<sub>2</sub>NH), 1.67 (m, 2H, OCH<sub>2</sub>CH<sub>2</sub>CH<sub>2</sub>NH<sub>2</sub>), 1.45 (s, 18H, C(CH<sub>3</sub>)<sub>3</sub>); <sup>13</sup>C NMR (75 MHz, CDCl<sub>3</sub>) δ 166.4 (C<sub>3</sub>N<sub>3</sub>), 165.3 (C<sub>3</sub>N<sub>3</sub>), 154.9 (CO), 79.9 (C(CH<sub>3</sub>)<sub>3</sub>), 70.7 (OCH<sub>2</sub>CH<sub>2</sub>O), 70.3 (OCH<sub>2</sub>CH<sub>2</sub>O), 70.2 (OCH<sub>2</sub>CH<sub>2</sub>O), 69.5 (two lines, NHCH<sub>2</sub>CH<sub>2</sub>CH<sub>2</sub>O, OCH<sub>2</sub>CH<sub>2</sub>CH<sub>2</sub>NH<sub>2</sub>), 43.0 (piperazine), 39.7 (NHCH<sub>2</sub>CH<sub>2</sub>CH<sub>2</sub>O), 38.3 (OCH<sub>2</sub>CH<sub>2</sub>CH<sub>2</sub>NH<sub>2</sub>), 33.2 (OCH<sub>2</sub>CH<sub>2</sub>CH<sub>2</sub>NH<sub>2</sub>), 29.7 (NHCH<sub>2</sub>CH<sub>2</sub>CH<sub>2</sub>O), 28.5 (C(CH<sub>3</sub>)<sub>3</sub>); MS (ESI) calcd for C<sub>31</sub>H<sub>57</sub>N<sub>9</sub>O<sub>7</sub> 667.4381, found 668.3845 (M + H)<sup>+</sup>.

**Compound 2.** Cyanuric chloride (0.54 g, 2.93 mmol) was added to a solution of **1** (4.0 g, 5.99 mmol) and DIPEA (2.0 mL, 11.4 mmol) in THF (70 mL) at 0 °C. The solution was warmed to room temperature, stirred for 24 h, and then evaporated under vacuum. The residue was dissolved in dichloromethane, washed with brine, dried over MgSO<sub>4</sub>, filtered, and evaporated under vacuum. The crude product was purified by silica gel chromatography (DCM:MeOH = 15:1) to give **2** (3.8 g, 90%) as a white solid. <sup>1</sup>H NMR (300 MHz, CDCl<sub>3</sub>) δ 3.70 (br, 16H, NCH<sub>2</sub>CH<sub>2</sub>NBoc), 3.63-3.53 (m, 24H, CH<sub>2</sub>OCH<sub>2</sub>CH<sub>2</sub>OCH<sub>2</sub>CH<sub>2</sub>OCH<sub>2</sub>), 3.40 (br, 24H, NHCH<sub>2</sub>CH<sub>2</sub>CH<sub>2</sub>O, NCH<sub>2</sub>CH<sub>2</sub>NBoc), 1.81 (m, 8H, OCH<sub>2</sub>CH<sub>2</sub>CH<sub>2</sub>NH), 1.45 (s, 36H, C(CH<sub>3</sub>)<sub>3</sub>); <sup>13</sup>C NMR (75 MHz, CDCl<sub>3</sub>) δ 166.4 (C<sub>3</sub>N<sub>3</sub>), 165.9 (C<sub>3</sub>N<sub>3</sub>), 165.4 (C<sub>3</sub>N<sub>3</sub>), 154.9 (CO), 80.0 (C(CH<sub>3</sub>)<sub>3</sub>), 70.7 (OCH<sub>2</sub>CH<sub>2</sub>O), 70.4 (OCH<sub>2</sub>CH<sub>2</sub>O), 69.5 (NHCH<sub>2</sub>CH<sub>2</sub>CH<sub>2</sub>O), 43.1 (piperazine), 39.1 (NHCH<sub>2</sub>CH<sub>2</sub>CH<sub>2</sub>O), 38.4 (NHCH<sub>2</sub>CH<sub>2</sub>CH<sub>2</sub>O), 29.7 (NHCH<sub>2</sub>CH<sub>2</sub>CH<sub>2</sub>O), 29.0 (NHCH<sub>2</sub>CH<sub>2</sub>CH<sub>2</sub>O), 28.5 (C(CH<sub>3</sub>)<sub>3</sub>); MS (MALDI-TOF) calcd for C<sub>65</sub>H<sub>112</sub>ClN<sub>21</sub>O<sub>14</sub> 1445.8386, found 1446.8088 (M + H)<sup>+</sup>.

**Compound 3.** A solution of **1** (1.79g, 2.68 mmol), **2** (1.32 g, 0.91 mmol), and DIPEA (1 mL, 5.70 mmol) in THF (20 mL) was refluxed for 24 h. The solution was evaporated under vacuum. The residue was dissolved in dichloromethane, washed with brine, dried

<sup>S1</sup> Chen, H. -T.; Neerman, M. F.; Parrish, A. R.; Simanek, E. E. *J. Am. Chem. Soc.* **2004**, *126*, 10044-10048.

over MgSO<sub>4</sub>, filtered, and evaporated under vacuum. The crude product was purified by silica gel chromatography (DCM:MeOH = 10:1) to give **3** (1.53 g, 81%) as a white solid. <sup>1</sup>H NMR (300 MHz, CDCl<sub>3</sub>) δ 3.65 (br, 24H, NCH<sub>2</sub>CH<sub>2</sub>NBoc), 3.59-3.46 (m, 36H, CH<sub>2</sub>OCH<sub>2</sub>CH<sub>2</sub>OCH<sub>2</sub>CH<sub>2</sub>OCH<sub>2</sub>), 3.36 (br, 36H, NHCH<sub>2</sub>CH<sub>2</sub>CH<sub>2</sub>O, NCH<sub>2</sub>CH<sub>2</sub>NBoc), 1.75 (m, 12H, OCH<sub>2</sub>CH<sub>2</sub>CH<sub>2</sub>NH), 1.40 (s, 54H, C(CH<sub>3</sub>)<sub>3</sub>); <sup>13</sup>C NMR (75 MHz, CDCl<sub>3</sub>) δ 166.2 (C<sub>3</sub>N<sub>3</sub>), 165.2 (C<sub>3</sub>N<sub>3</sub>), 154.7 (CO), 79.8 (C(CH<sub>3</sub>)<sub>3</sub>), 70.5 (OCH<sub>2</sub>CH<sub>2</sub>O), 70.2 (two lines, OCH<sub>2</sub>CH<sub>2</sub>O), 69.2 (two lines, NHCH<sub>2</sub>CH<sub>2</sub>CH<sub>2</sub>O), 42.8 (piperazine), 38.2 (NHCH<sub>2</sub>CH<sub>2</sub>CH<sub>2</sub>O), 38.1 (NHCH<sub>2</sub>CH<sub>2</sub>CH<sub>2</sub>O), 29.6 (NHCH<sub>2</sub>CH<sub>2</sub>CH<sub>2</sub>O), 28.4 (C(CH<sub>3</sub>)<sub>3</sub>); MS (MALDI-TOF) calcd for C<sub>96</sub>H<sub>168</sub>N<sub>30</sub>O<sub>21</sub> 2077.3000, found 2078.3853 (M + H)<sup>+</sup>.

**Compound 4.** A solution of **3** (0.14 g, 0.0674 mmol) in concentrated HCl (3 mL) and methanol (3 mL) was stirred for 12 h at room temperature and then evaporated under vacuum. The residue was dissolved in chloroform, washed with 5 M NaOH (aq), dried over MgSO<sub>4</sub>, filtered, and evaporated under vacuum to give **4** (0.10 g, quantitative) as a white product. <sup>1</sup>H NMR (300 MHz, CDCl<sub>3</sub>) δ 3.64 (br, 24H, NCH<sub>2</sub>CH<sub>2</sub>NH), 3.57-3.51 (br m, 36H, CH<sub>2</sub>OCH<sub>2</sub>CH<sub>2</sub>OCH<sub>2</sub>CH<sub>2</sub>OCH<sub>2</sub>), 3.37 (br, 12H, NHCH<sub>2</sub>CH<sub>2</sub>CH<sub>2</sub>O), 2.78 (br, 24H, NCH<sub>2</sub>CH<sub>2</sub>NH), 1.74 (br, 12H, OCH<sub>2</sub>CH<sub>2</sub>CH<sub>2</sub>NH); <sup>13</sup>C NMR (75 MHz, CDCl<sub>3</sub>) δ 166.3 (C<sub>3</sub>N<sub>3</sub>), 165.2 (C<sub>3</sub>N<sub>3</sub>), 70.6 (OCH<sub>2</sub>CH<sub>2</sub>O), 70.2 (OCH<sub>2</sub>CH<sub>2</sub>O), 69.3 (NHCH<sub>2</sub>CH<sub>2</sub>CH<sub>2</sub>O), 69.2 (NHCH<sub>2</sub>CH<sub>2</sub>CH<sub>2</sub>O), 46.0 (NCH<sub>2</sub>CH<sub>2</sub>NH), 44.2 (NCH<sub>2</sub>CH<sub>2</sub>NH), 38.1 (NHCH<sub>2</sub>CH<sub>2</sub>CH<sub>2</sub>O), 38.0 (NHCH<sub>2</sub>CH<sub>2</sub>CH<sub>2</sub>O), 29.7 (NHCH<sub>2</sub>CH<sub>2</sub>CH<sub>2</sub>O); MS (MALDI-TOF) calcd for C<sub>66</sub>H<sub>120</sub>N<sub>30</sub>O<sub>9</sub> 1476.9855, found 1478.1023 (M + H)<sup>+</sup>.

**Compound 5.** A solution of **2** (0.80 g, 0.553 mmol), **4** (0.10 g, 0.0677 mmol), and DIPEA (0.30 mL, 1.71 mmol) in THF (3.0 mL), methanol (0.2 mL), and H<sub>2</sub>O (0.2 mL) was refluxed for 48 h. The solution was evaporated under vacuum. The residue was dissolved in dichloromethane, washed with brine, dried over MgSO<sub>4</sub>, filtered, and evaporated under vacuum. The crude product was purified by silica gel chromatography (from DCM:EA:MeOH = 10:10:1 to DCM:MeOH = 10:1) to give **5** (0.605 g, 90%) as a white solid. The excess/unreacted **2** was recovered from the purification step and reused. <sup>1</sup>H NMR (300 MHz, CDCl<sub>3</sub>) δ 3.67 (br, 144H, NCH<sub>2</sub>CH<sub>2</sub>NBoc, NCH<sub>2</sub>CH<sub>2</sub>N), 3.61-3.47 (m, 180H, CH<sub>2</sub>OCH<sub>2</sub>CH<sub>2</sub>OCH<sub>2</sub>CH<sub>2</sub>OCH<sub>2</sub>), 3.38 (br, 156H, NHCH<sub>2</sub>CH<sub>2</sub>CH<sub>2</sub>O, NCH<sub>2</sub>CH<sub>2</sub>NBoc), 1.78 (m, 60H, OCH<sub>2</sub>CH<sub>2</sub>CH<sub>2</sub>NH), 1.43 (s, 216H, C(CH<sub>3</sub>)<sub>3</sub>); <sup>13</sup>C NMR (75 MHz, CDCl<sub>3</sub>) δ 166.3 (C<sub>3</sub>N<sub>3</sub>), 165.2 (C<sub>3</sub>N<sub>3</sub>), 154.8 (CO), 79.8 (C(CH<sub>3</sub>)<sub>3</sub>), 70.6 (OCH<sub>2</sub>CH<sub>2</sub>O), 70.2 (OCH<sub>2</sub>CH<sub>2</sub>O), 69.3 (two lines, NHCH<sub>2</sub>CH<sub>2</sub>CH<sub>2</sub>O), 42.9 (piperazine), 38.2 (NHCH<sub>2</sub>CH<sub>2</sub>CH<sub>2</sub>O), 38.1 (NHCH<sub>2</sub>CH<sub>2</sub>CH<sub>2</sub>O), 29.6 (NHCH<sub>2</sub>CH<sub>2</sub>CH<sub>2</sub>O), 28.4 (C(CH<sub>3</sub>)<sub>3</sub>); MS (MALDI-TOF) calcd for C<sub>456</sub>H<sub>786</sub>N<sub>156</sub>O<sub>93</sub> 9936.16, found 9945.30 (M + H)<sup>+</sup>.

**Compound 6.** A solution of **5** (0.58 g, 0.0583 mmol) in concentrated HCl (5 mL) and methanol (5 mL) was stirred for 12 h at room temperature and then evaporated under vacuum. The residue was dissolved in chloroform, washed with 5 M NaOH (aq), dried over MgSO<sub>4</sub>, filtered, and evaporated under vacuum to give **6** (0.44 g, quantitative) as a white product. <sup>1</sup>H NMR (300 MHz, CDCl<sub>3</sub>) δ 3.65 (br, 144H, NCH<sub>2</sub>CH<sub>2</sub>NH, NCH<sub>2</sub>CH<sub>2</sub>N), 3.57-3.45 (m, 180H, CH<sub>2</sub>OCH<sub>2</sub>CH<sub>2</sub>OCH<sub>2</sub>CH<sub>2</sub>OCH<sub>2</sub>), 3.38 (br, 60H,

NHCH<sub>2</sub>CH<sub>2</sub>CH<sub>2</sub>O), 2.79 (br, 96H, NCH<sub>2</sub>CH<sub>2</sub>NH), 1.76 (m, 60H, OCH<sub>2</sub>CH<sub>2</sub>CH<sub>2</sub>NH); <sup>13</sup>C NMR (75 MHz, CDCl<sub>3</sub>) δ 166.3 (C<sub>3</sub>N<sub>3</sub>), 165.2 (C<sub>3</sub>N<sub>3</sub>), 70.6 (OCH<sub>2</sub>CH<sub>2</sub>O), 70.2 (OCH<sub>2</sub>CH<sub>2</sub>O), 69.3 (NHCH<sub>2</sub>CH<sub>2</sub>CH<sub>2</sub>O), 69.2 (NHCH<sub>2</sub>CH<sub>2</sub>CH<sub>2</sub>O), 46.0 (NCH<sub>2</sub>CH<sub>2</sub>NH), 44.2 (NCH<sub>2</sub>CH<sub>2</sub>NH), 42.9 (NCH<sub>2</sub>CH<sub>2</sub>N), 38.1 (NHCH<sub>2</sub>CH<sub>2</sub>CH<sub>2</sub>O), 29.7 (NHCH<sub>2</sub>CH<sub>2</sub>CH<sub>2</sub>O); MS (MALDI-TOF) calcd for C<sub>336</sub>H<sub>594</sub>N<sub>156</sub>O<sub>45</sub> 7534.90, found 7520.91 (M + H)<sup>+</sup>.

**Compound 7.** A solution of **2** (1.0 g, 0.691 mmol), **6** (0.10 g, 0.0133 mmol), and DIPEA (0.30 mL, 1.71 mmol) in THF (4.0 mL), methanol (0.25 mL), and H<sub>2</sub>O (0.25 mL) was refluxed for 48 h. The solution was evaporated under vacuum. The residue was dissolved in chloroform, washed with brine, dried over MgSO<sub>4</sub>, filtered, and evaporated under vacuum. The crude product was purified by silica gel chromatography (from EA:MeOH = 40:1 to DCM:MeOH = 9:1) to give **7** (0.49 g, 89%) as a white solid. The excess/unreacted **2** was recovered from the purification step and reused. <sup>1</sup>H NMR (300 MHz, CDCl<sub>3</sub>) δ 3.69 (br, 624H, NCH<sub>2</sub>CH<sub>2</sub>NBoc, NCH<sub>2</sub>CH<sub>2</sub>N), 3.62-3.49 (m, 756H, CH<sub>2</sub>OCH<sub>2</sub>CH<sub>2</sub>OCH<sub>2</sub>CH<sub>2</sub>OCH<sub>2</sub>), 3.40 (br, 636H, NHCH<sub>2</sub>CH<sub>2</sub>CH<sub>2</sub>O, NCH<sub>2</sub>CH<sub>2</sub>NBoc), 1.79 (m, 252H, OCH<sub>2</sub>CH<sub>2</sub>CH<sub>2</sub>NH), 1.45 (s, 864H, C(CH<sub>3</sub>)<sub>3</sub>); <sup>13</sup>C NMR (75 MHz, CDCl<sub>3</sub>) δ 166.4 (C<sub>3</sub>N<sub>3</sub>), 165.3 (C<sub>3</sub>N<sub>3</sub>), 154.9 (CO), 79.8 (C(CH<sub>3</sub>)<sub>3</sub>), 70.7 (OCH<sub>2</sub>CH<sub>2</sub>O), 70.3 (OCH<sub>2</sub>CH<sub>2</sub>O), 69.4 (two lines, NHCH<sub>2</sub>CH<sub>2</sub>CH<sub>2</sub>O), 42.9 (piperazine), 38.3 (NHCH<sub>2</sub>CH<sub>2</sub>CH<sub>2</sub>O), 29.7 (NHCH<sub>2</sub>CH<sub>2</sub>CH<sub>2</sub>O), 28.5 (C(CH<sub>3</sub>)<sub>3</sub>); MS (MALDI-TOF) calcd for C<sub>1896</sub>H<sub>3258</sub>N<sub>660</sub>O<sub>381</sub> 41371.59, found 41258.42 (M + H)<sup>+</sup>.

**Compound 8.** A solution of **7** (0.48 g, 0.0116 mmol) in concentrated HCl (5 mL) and methanol (5 mL) was stirred for 12 h at room temperature and then evaporated under vacuum. The residue was dissolved in chloroform, washed with 5 M NaOH (aq), dried over MgSO<sub>4</sub>, filtered, and evaporated under vacuum to give **8** (0.37 g, quantitative) as a white product. <sup>1</sup>H NMR (300 MHz, CDCl<sub>3</sub>) δ 3.69 (br, 624H, NCH<sub>2</sub>CH<sub>2</sub>NH, NCH<sub>2</sub>CH<sub>2</sub>N), 3.58-3.47 (br m, 756H, CH<sub>2</sub>OCH<sub>2</sub>CH<sub>2</sub>OCH<sub>2</sub>CH<sub>2</sub>OCH<sub>2</sub>), 3.39 (br, 252H, NHCH<sub>2</sub>CH<sub>2</sub>CH<sub>2</sub>O), 2.83 (br, 384H, NCH<sub>2</sub>CH<sub>2</sub>NH), 1.77 (br, 252H, OCH<sub>2</sub>CH<sub>2</sub>CH<sub>2</sub>NH); <sup>13</sup>C NMR (75 MHz, CDCl<sub>3</sub>) δ 166.3 (C<sub>3</sub>N<sub>3</sub>), 165.2 (C<sub>3</sub>N<sub>3</sub>), 70.6 (OCH<sub>2</sub>CH<sub>2</sub>O), 70.2 (OCH<sub>2</sub>CH<sub>2</sub>O), 69.3 (two lines, NHCH<sub>2</sub>CH<sub>2</sub>CH<sub>2</sub>O), 45.8 (NCH<sub>2</sub>CH<sub>2</sub>NH), 43.9 (NCH<sub>2</sub>CH<sub>2</sub>NH), 43.0 (NCH<sub>2</sub>CH<sub>2</sub>N), 38.2 (NHCH<sub>2</sub>CH<sub>2</sub>CH<sub>2</sub>O), 29.7 (NHCH<sub>2</sub>CH<sub>2</sub>CH<sub>2</sub>O); MS (MALDI-TOF) calcd for C<sub>1416</sub>H<sub>2490</sub>N<sub>660</sub>O<sub>189</sub> 31766.55, found 31764.04 (M + H)<sup>+</sup>.

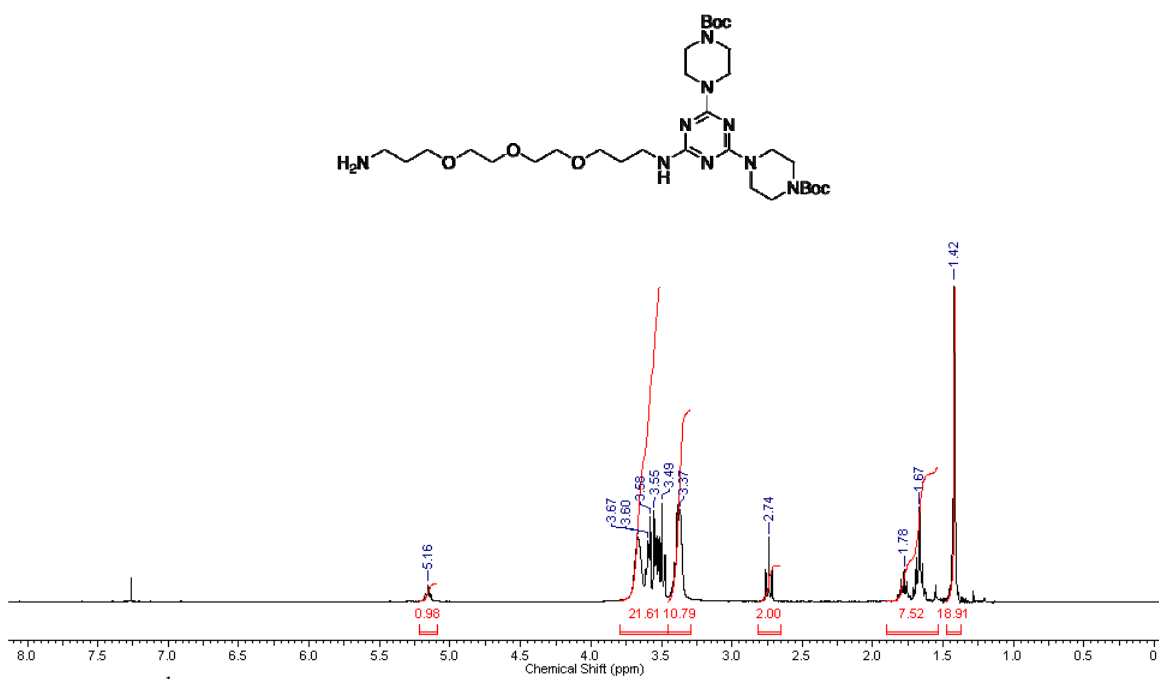

**Figure S1.** <sup>1</sup>H NMR spectrum of **1** (300 MHz, CDCl<sub>3</sub>).

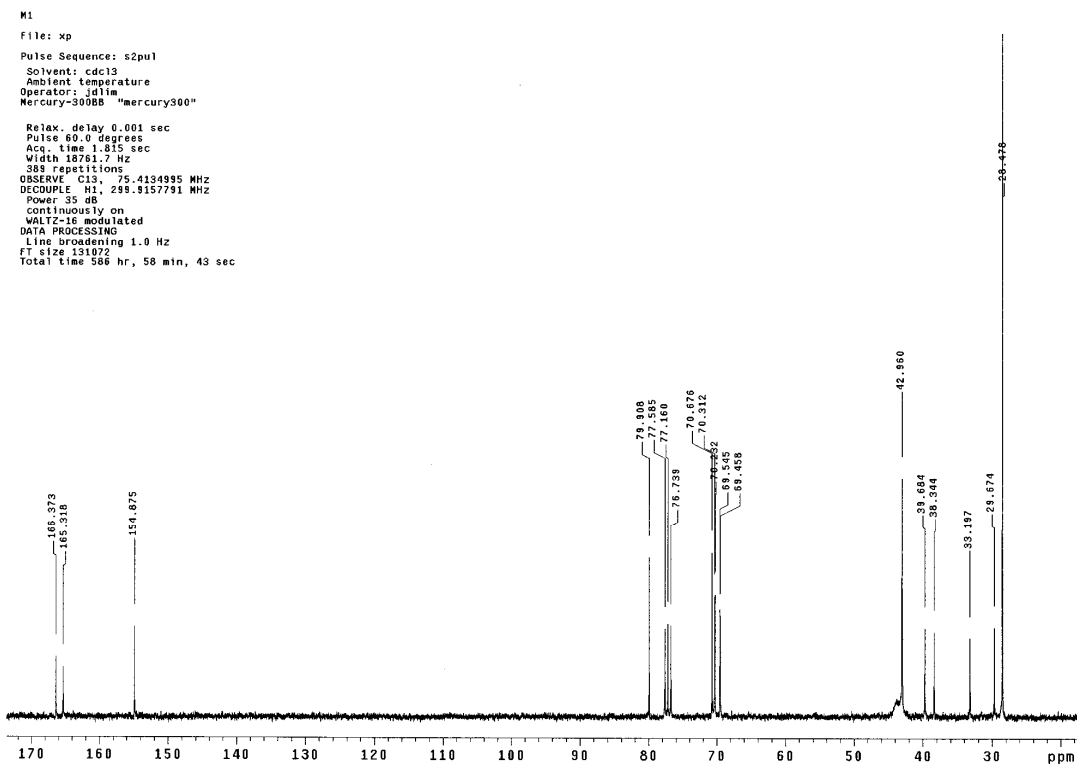

**Figure S2.** <sup>13</sup>C NMR spectrum of **1** (75 MHz, CDCl<sub>3</sub>).

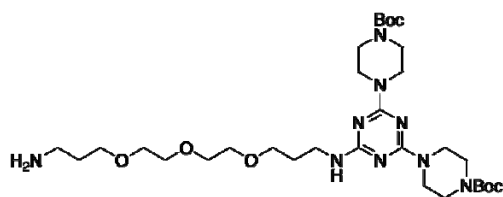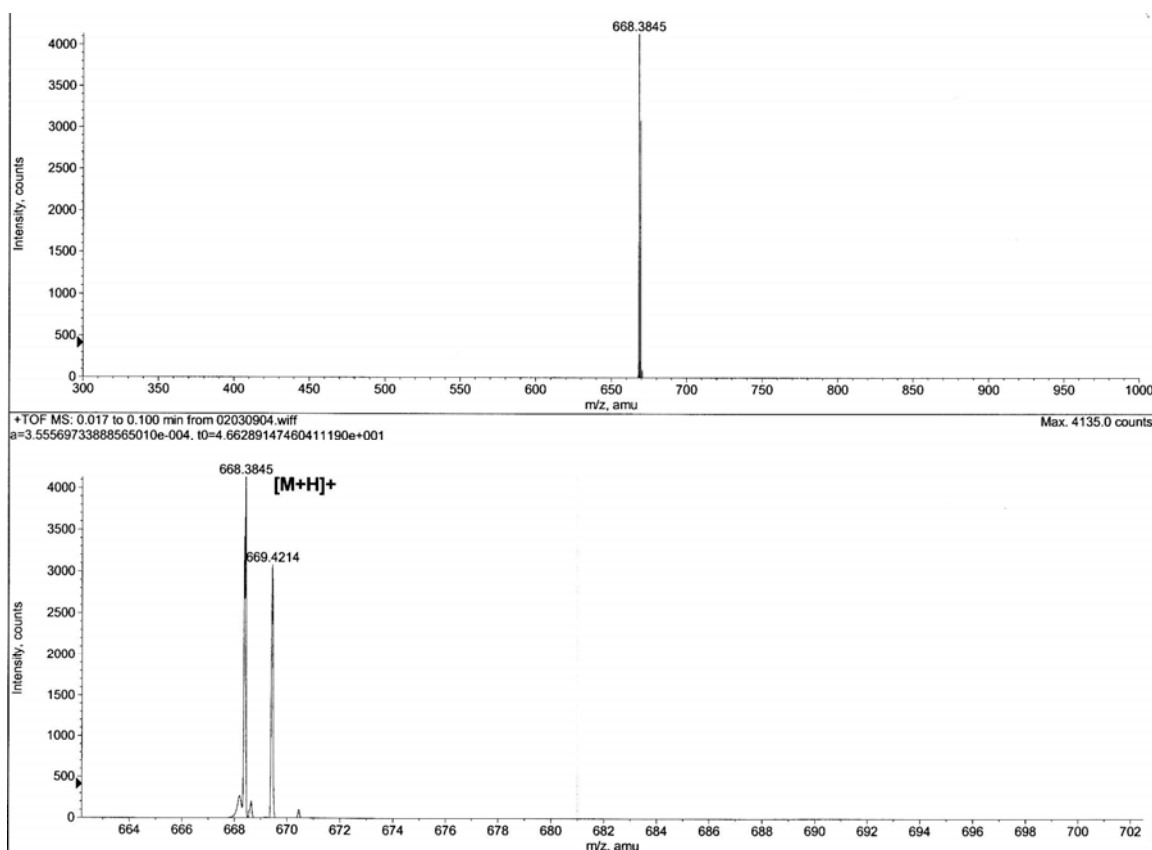

**Figure S3.** ESI-TOF mass spectrum of **1**.

Chemical Formula:  $C_{31}H_{57}N_9O_7 + H^+$

Exact Mass: 668.4459

Molecular Weight: 668.8483

m/z: 668.4459 (100.0%), 669.4493 (33.5%), 670.4526 (5.4%), 669.4430 (3.3%),  
670.4502 (1.4%), 670.4463 (1.1%)

Error:  $9 \times 10^{-5}$ ; 90 ppm



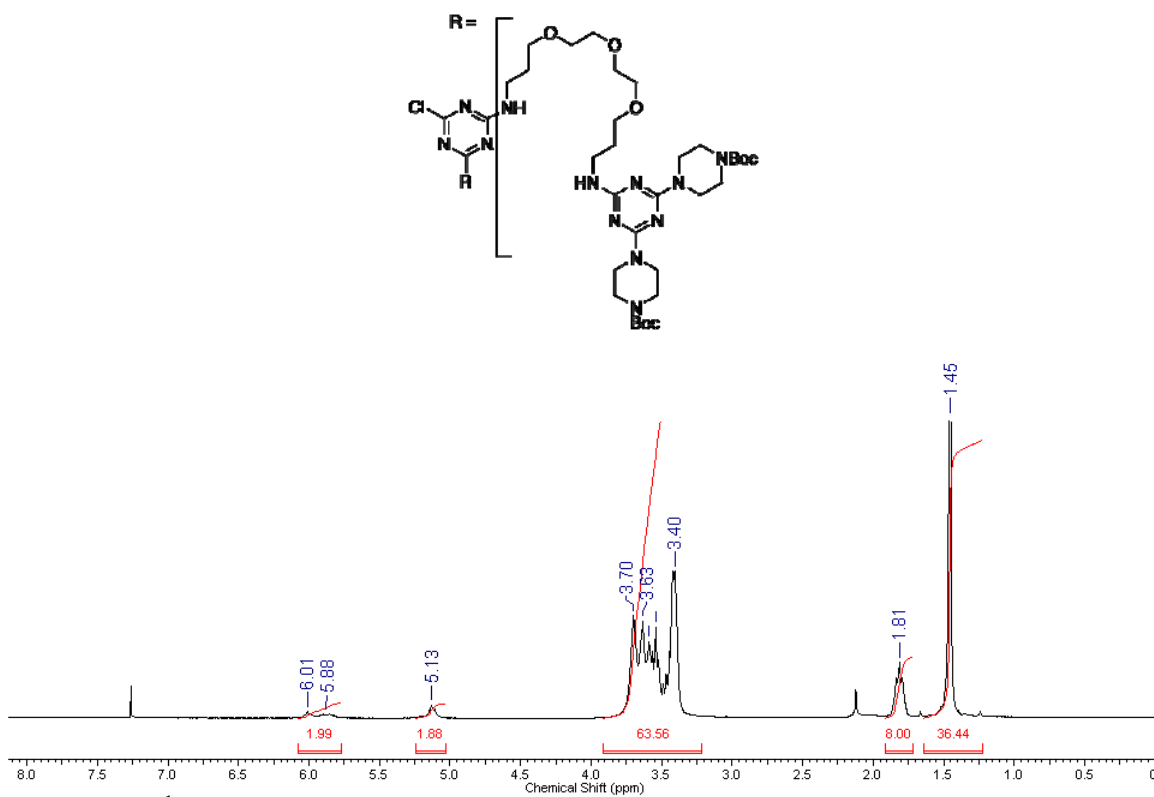

Figure S4.  $^1\text{H}$  NMR spectrum of 2 (300 MHz,  $\text{CDCl}_3$ ).

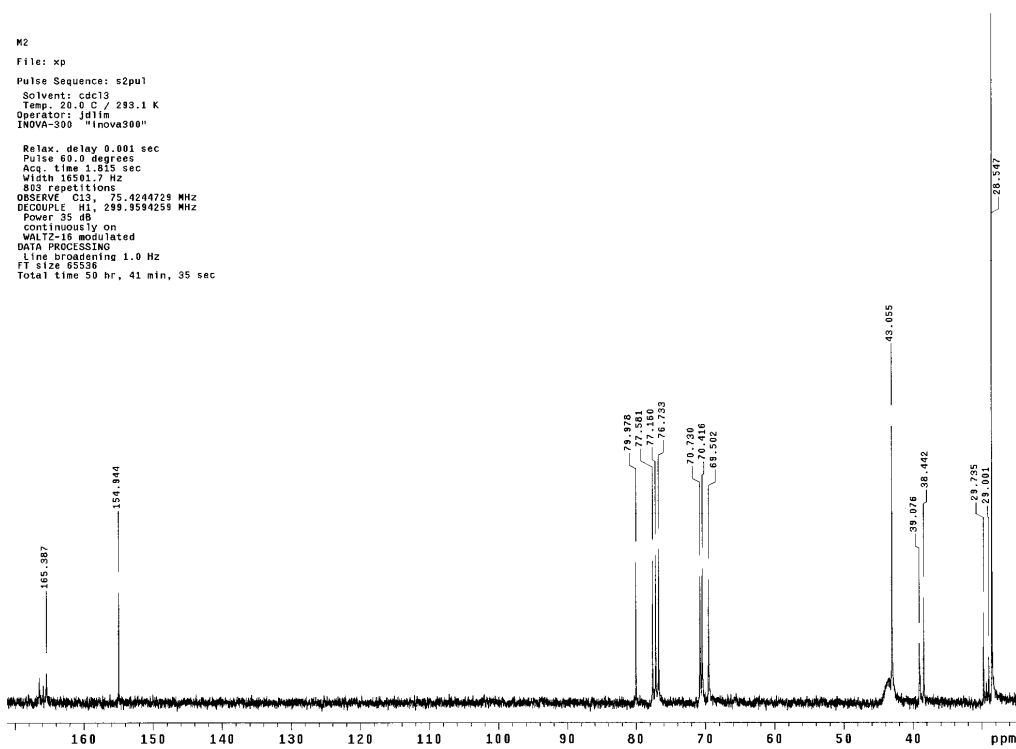

Figure S5.  $^{13}\text{C}$  NMR spectrum of 2 (75 MHz,  $\text{CDCl}_3$ ).

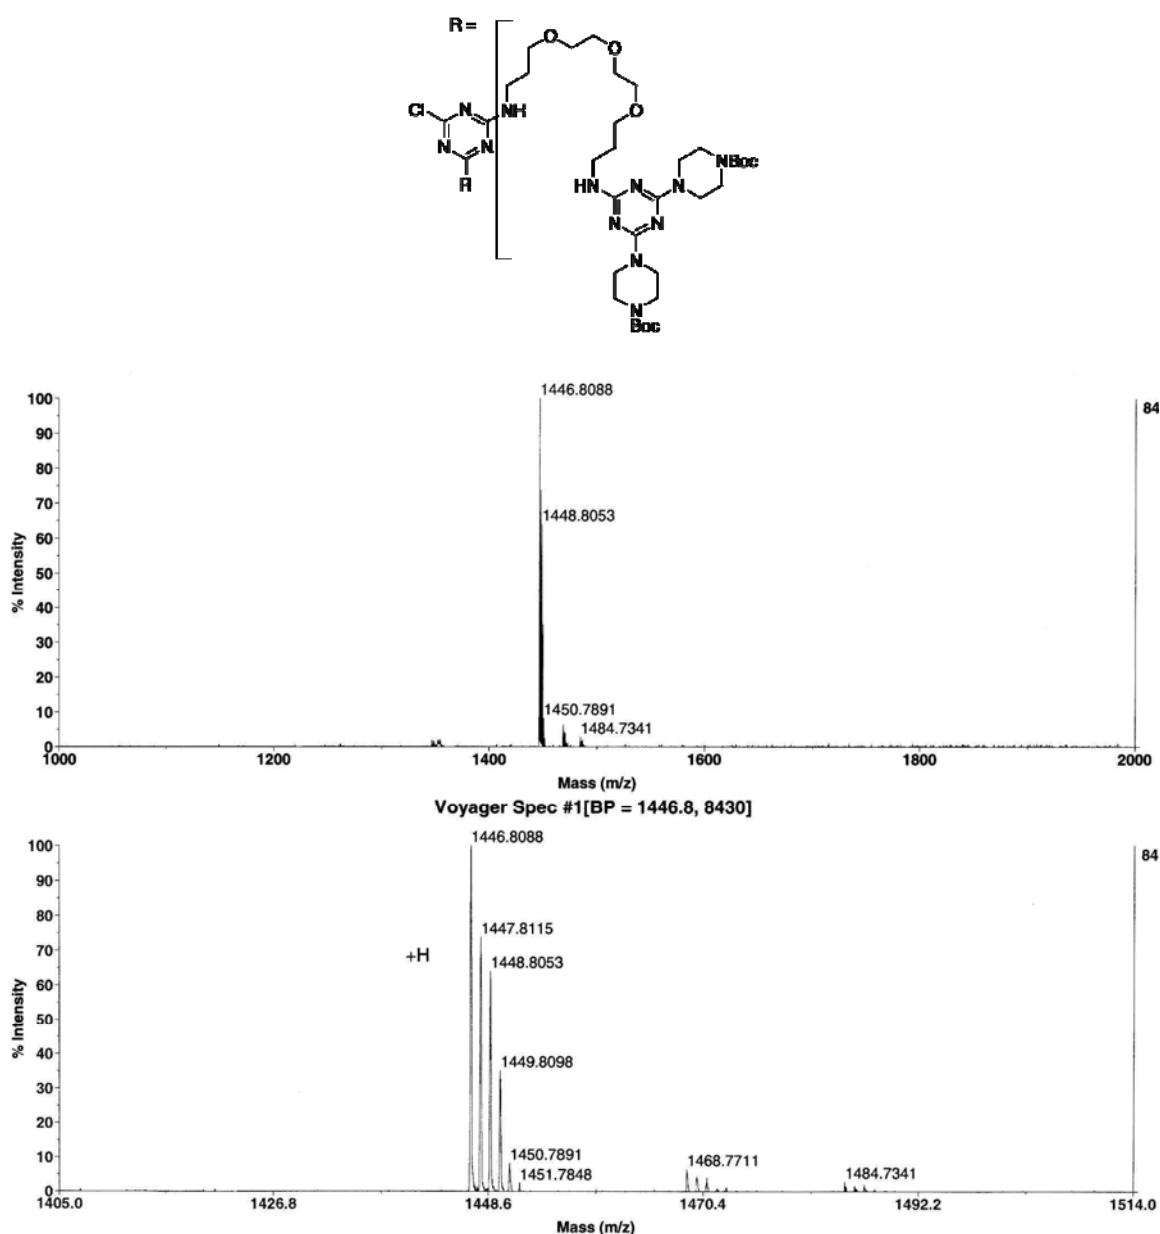

**Figure S6.** MALDI mass spectrum of **2**. Lines at lower m/z correspond to loss of a BOC group, a commonly observed feature in these traces.

Chemical Formula:  $C_{65}H_{112}ClN_{21}O_{14} + H^+$

Exact Mass: 1446.8464

Molecular Weight: 1448.1780

m/z: 1446.8464 (100.0%), 1447.8498 (70.3%), 1448.8435 (32.0%), 1448.8531 (24.3%), 1449.8468 (22.5%), 1450.8502 (7.8%), 1447.8435 (7.8%), 1449.8565 (5.5%), 1448.8468 (5.5%), 1448.8507 (2.9%), 1449.8405 (2.5%), 1449.8540 (2.0%), 1449.8502 (1.9%), 1451.8536 (1.8%), 1450.8439 (1.7%), 1447.8527 (1.3%)

Error:  $2.6 \times 10^{-5}$ ; 26 ppm

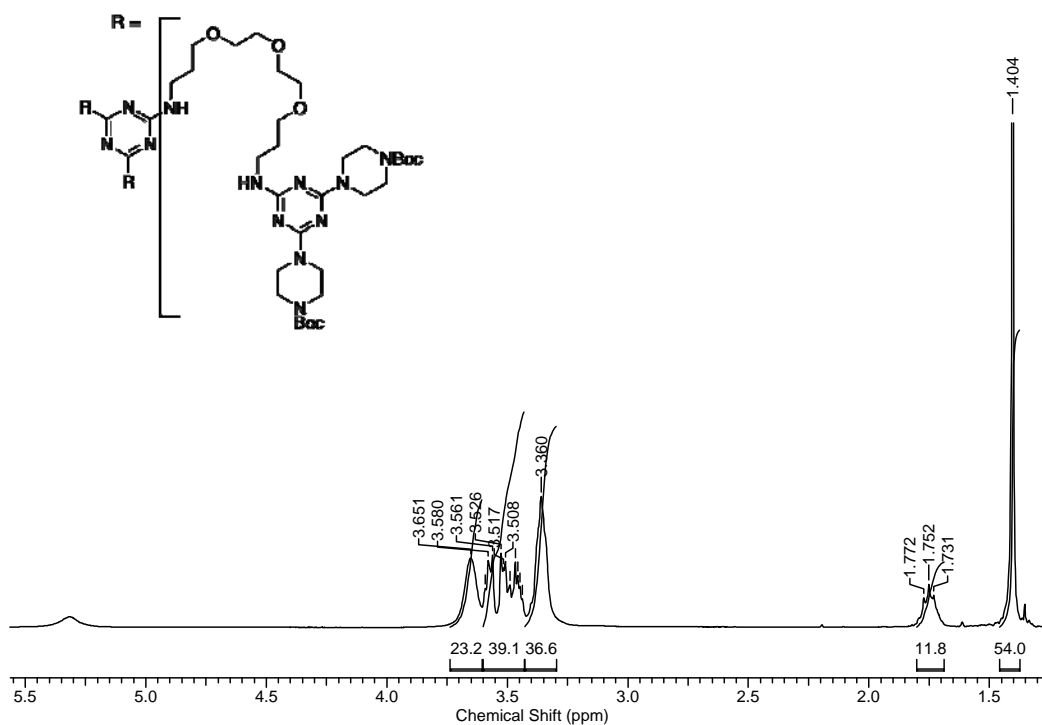

**Figure S7.**  $^1\text{H}$  NMR spectrum of dendrimer **3** (300 MHz,  $\text{CDCl}_3$ )

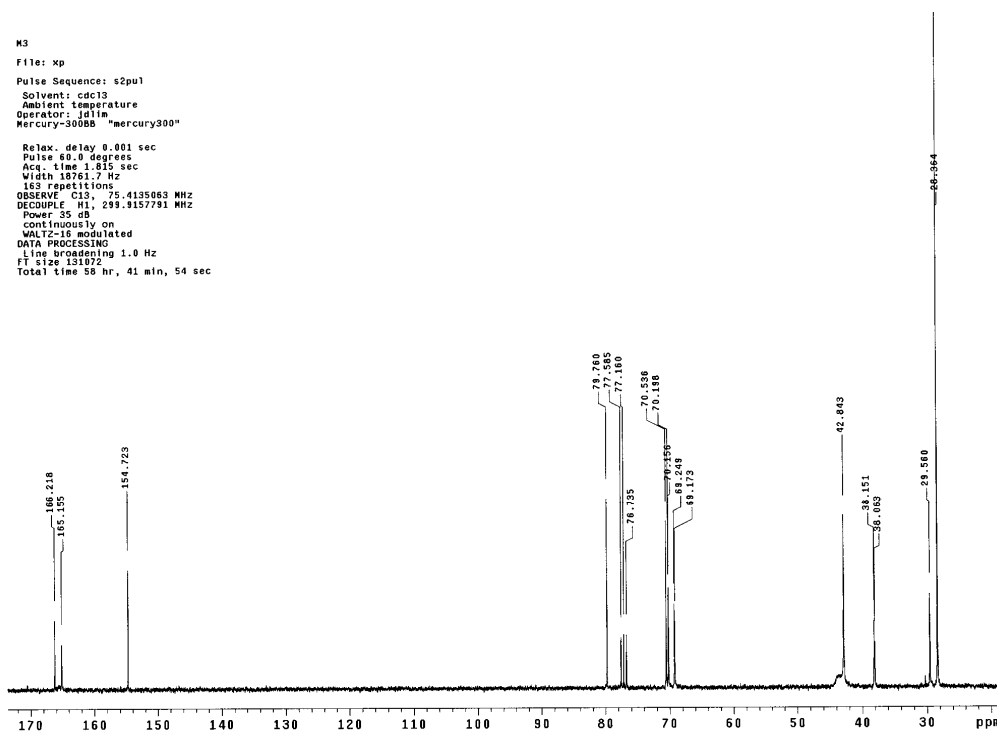

**Figure S8.**  $^{13}\text{C}$  NMR spectrum of dendrimer **3** (75 MHz,  $\text{CDCl}_3$ ).

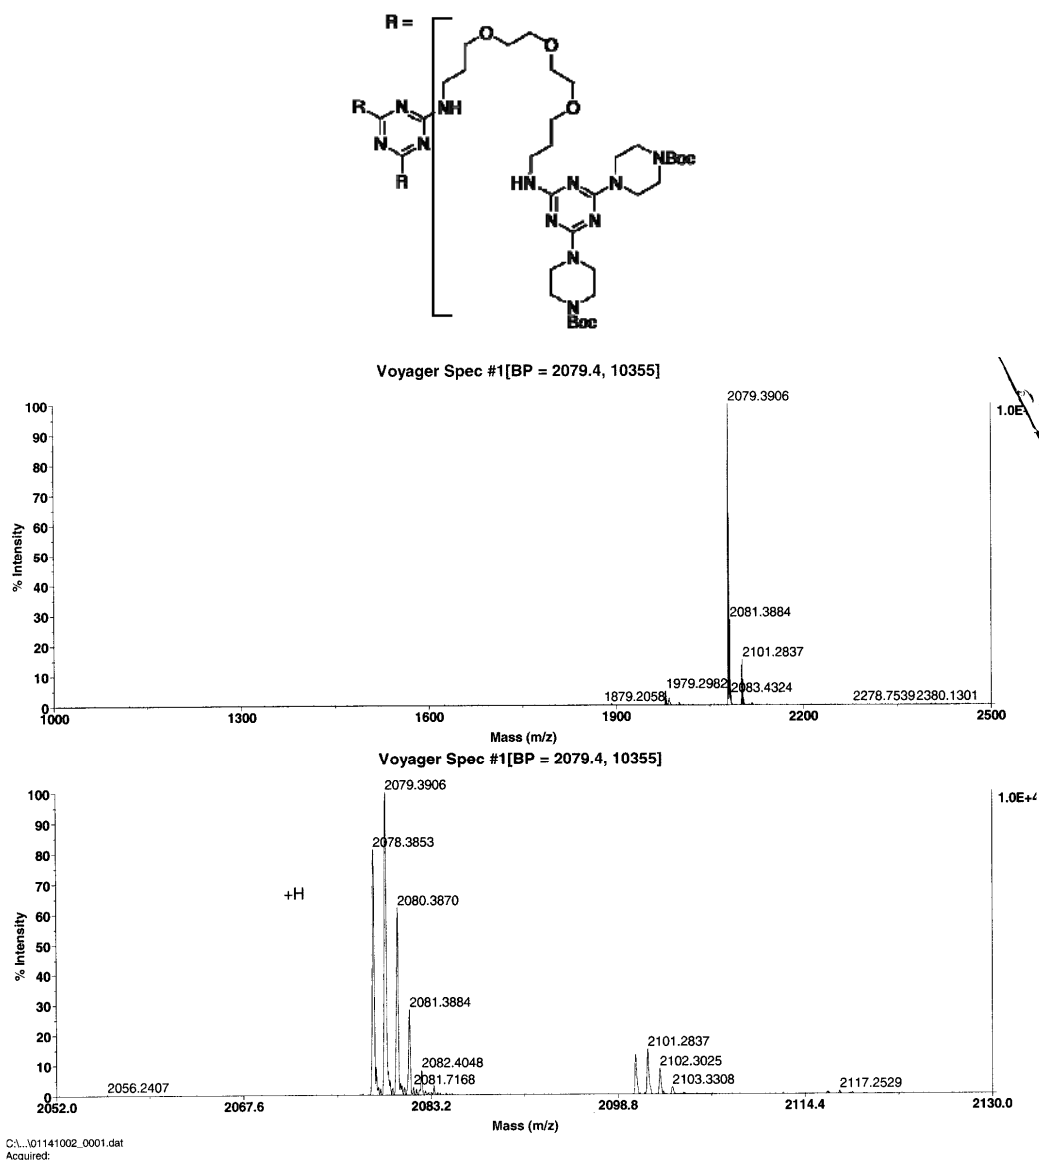

**Figure S9.** MALDI mass spectrum of dendrimer **3**. Loss of a BOC group is seen.

Chemical Formula:  $C_{96}H_{168}N_{30}O_{21} + H^+$

Exact Mass: 2078.3079

Molecular Weight: 2079.5575

m/z: 2079.3112 (100.0%), 2078.3079 (96.3%), 2080.3146 (51.4%), 2081.3179 (17.4%), 2080.3082 (11.1%), 2079.3049 (10.7%), 2081.3116 (5.7%), 2082.3213 (4.4%), 2081.3155 (4.3%), 2080.3121 (4.2%), 2082.3188 (2.2%), 2080.3175 (1.9%), 2082.3150 (1.9%), 2079.3141 (1.9%)

Error:  $4.5 \times 10^{-4}$ ; 450 ppm

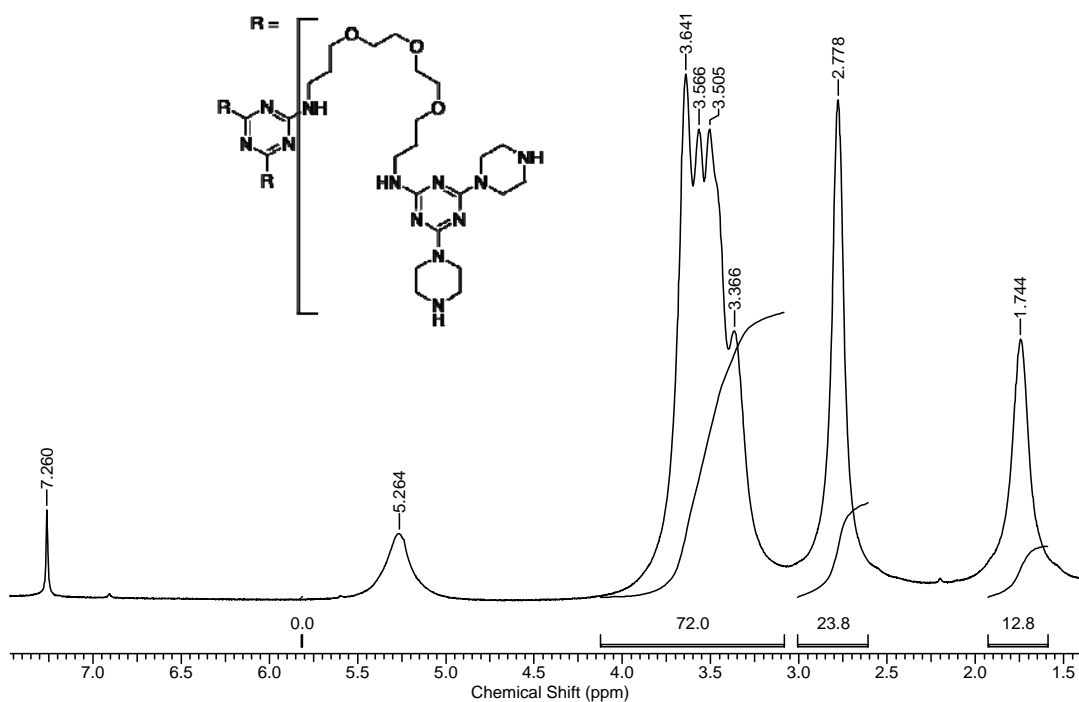

**Figure S10.**  $^1\text{H}$  NMR spectrum of dendrimer **4** (300 MHz,  $\text{CDCl}_3$ ).

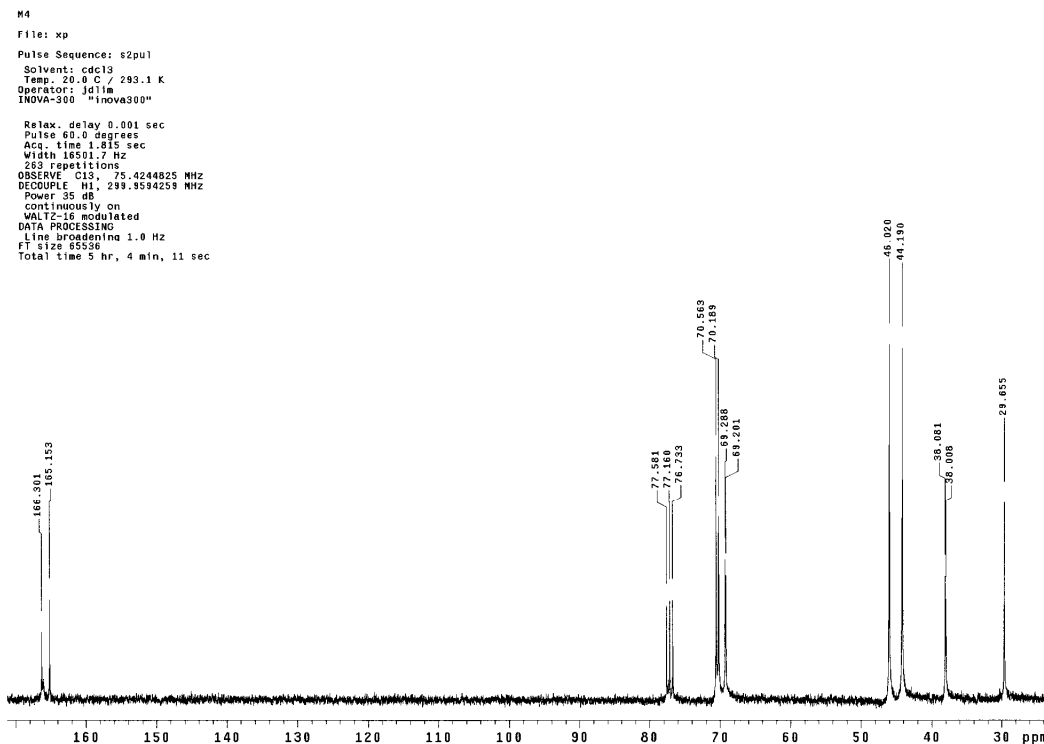

**Figure S11.**  $^{13}\text{C}$  NMR spectrum of dendrimer **4** (75 MHz,  $\text{CDCl}_3$ ).

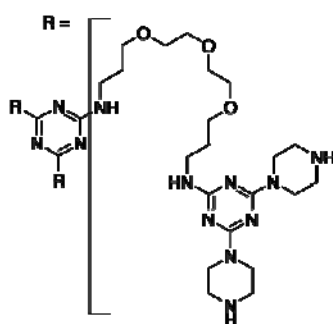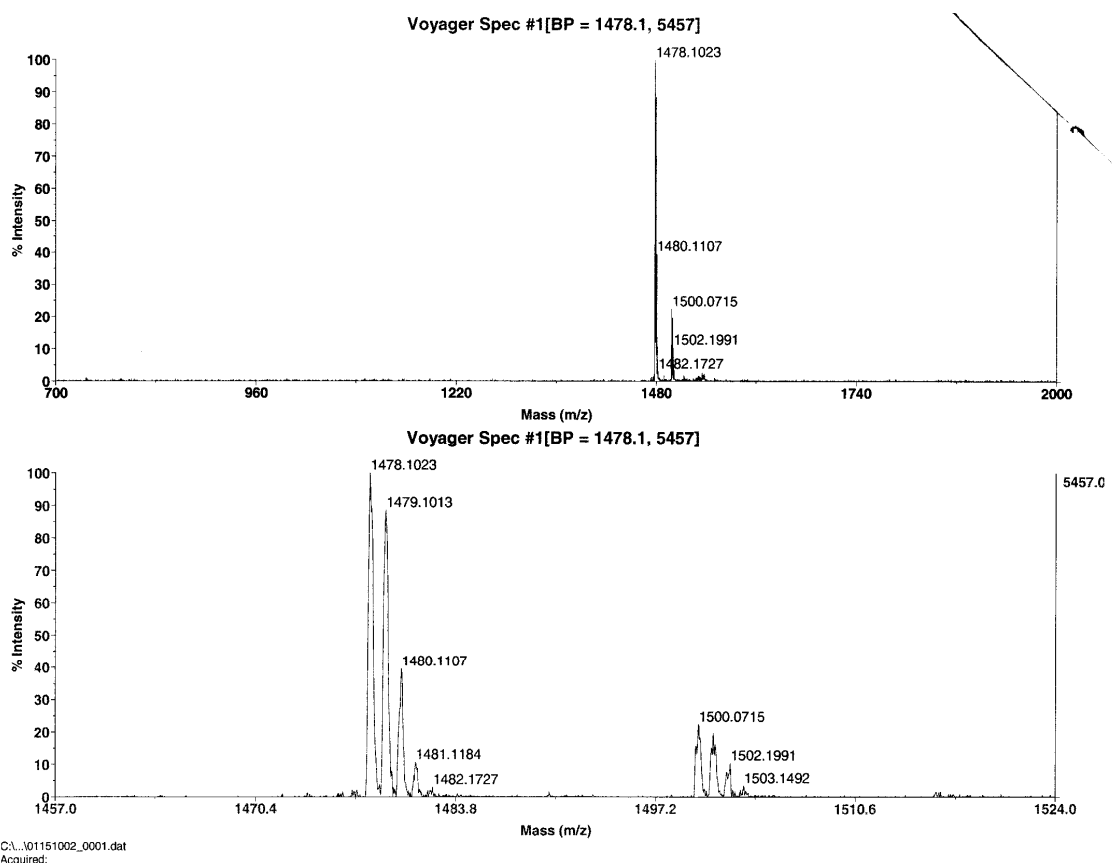

**Figure S12.** MALDI mass spectrum of dendrimer **4**.

Chemical Formula:  $C_{66}H_{120}N_{30}O_9 + H^+$

Exact Mass: 1477.9933

Molecular Weight: 1478.8625

m/z: 1477.9933 (100.0%), 1478.9966 (71.4%), 1480.0000 (25.1%), 1478.9903 (11.1%), 1479.9937 (7.9%), 1481.0033 (5.8%), 1480.9970 (2.8%), 1479.9975 (1.8%), 1478.9996 (1.4%), 1481.0009 (1.3%)

Error:  $7.4 \times 10^{-5}$ ; 74 ppm

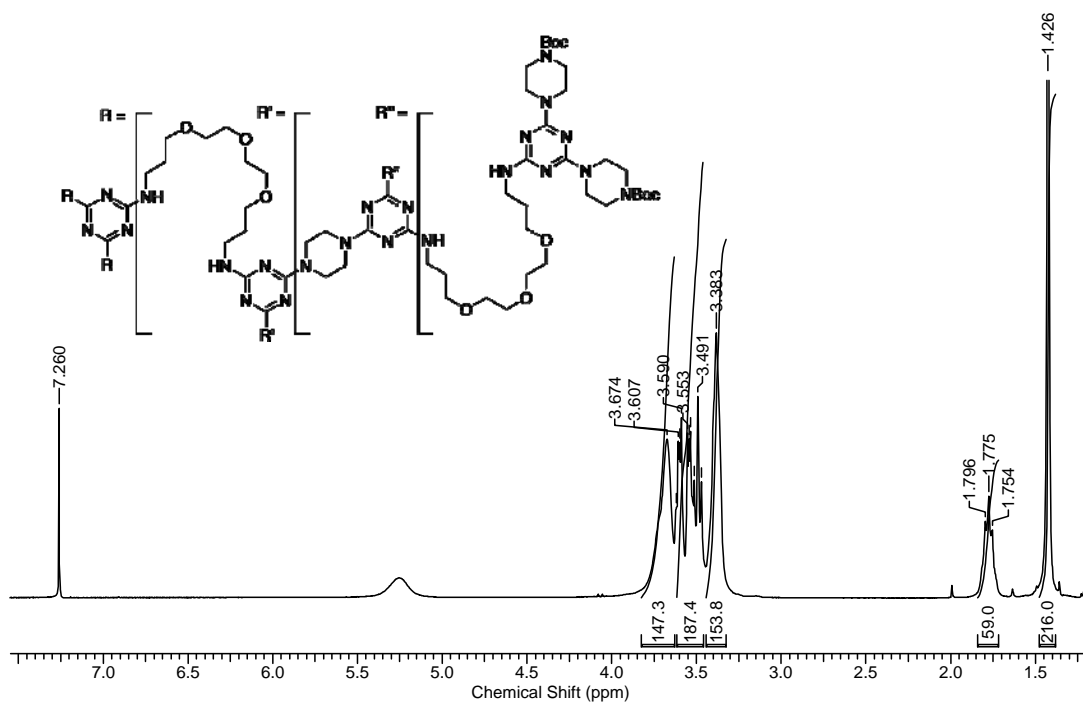

**Figure S13.**  $^1\text{H}$  NMR spectrum of dendrimer **5** (300 MHz,  $\text{CDCl}_3$ ).

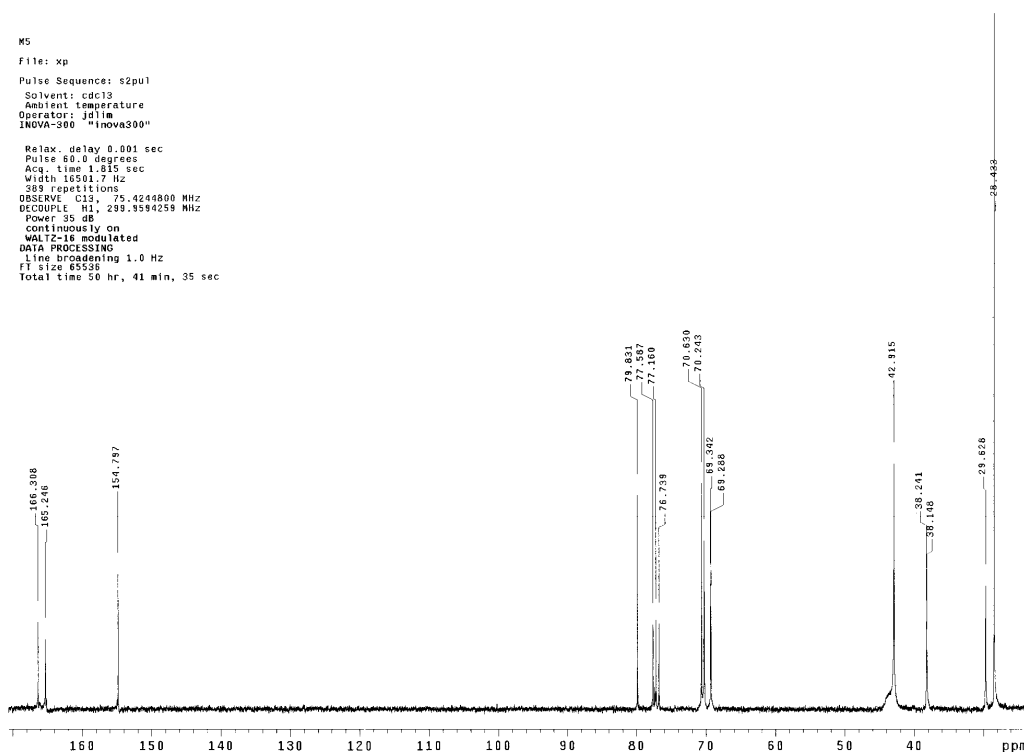

**Figure S14.**  $^{13}\text{C}$  NMR spectrum of dendrimer **5** (75 MHz,  $\text{CDCl}_3$ ).

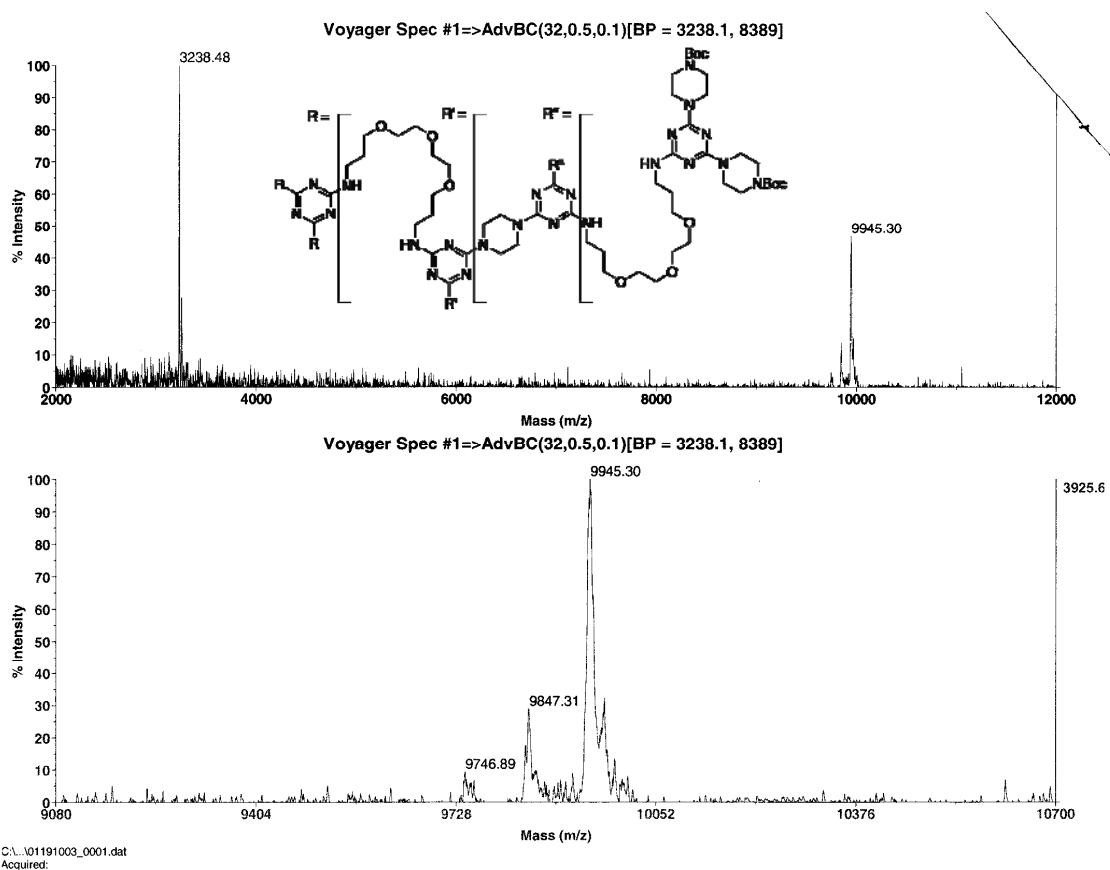

**Figure S15.** MALDI mass spectrum of dendrimer **5**. The minor ions correspond to loss of BOC ( $M+H-100$ ).<sup>+</sup> The ion at 3238 ( $m/z$ ) is believed to derive from the fragmentation during ionization: The peak is not observed after the following deprotection step. It corresponds to no predictable side reaction, and results from fragmentation of the flexible linker.

Chemical Formula:  $C_{456}H_{786}N_{156}O_{93} + H^+$

Exact Mass: 9937.1649

Molecular Weight: 9943.1174

$m/z$ : 9942.1817 (100.0%), 9941.1783 (84.3%), 9940.1750 (70.7%), 9943.1850 (67.0%), 9939.1716 (38.8%), 9938.1683 (18.8%), 9937.1649 (7.9%)

Error:  $3.1 \times 10^{-4}$ ; 310 ppm



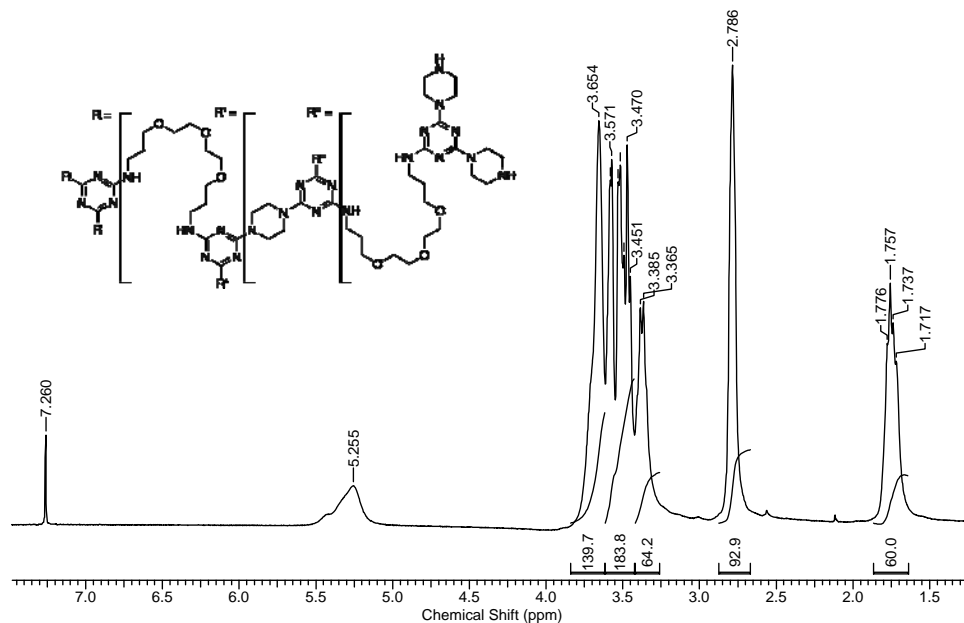

**Figure S16.** <sup>1</sup>H NMR spectrum of dendrimer 6 (300 MHz, CDCl<sub>3</sub>).

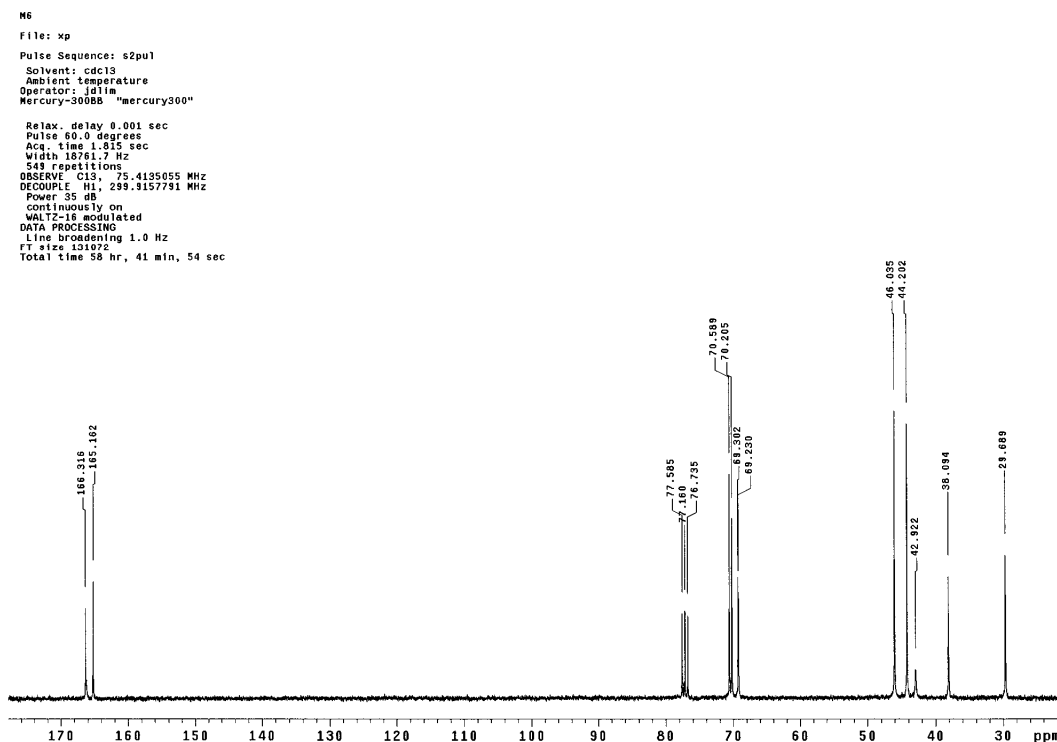

**Figure S17.** <sup>13</sup>C NMR spectrum of dendrimer 6 (75 MHz, CDCl<sub>3</sub>).

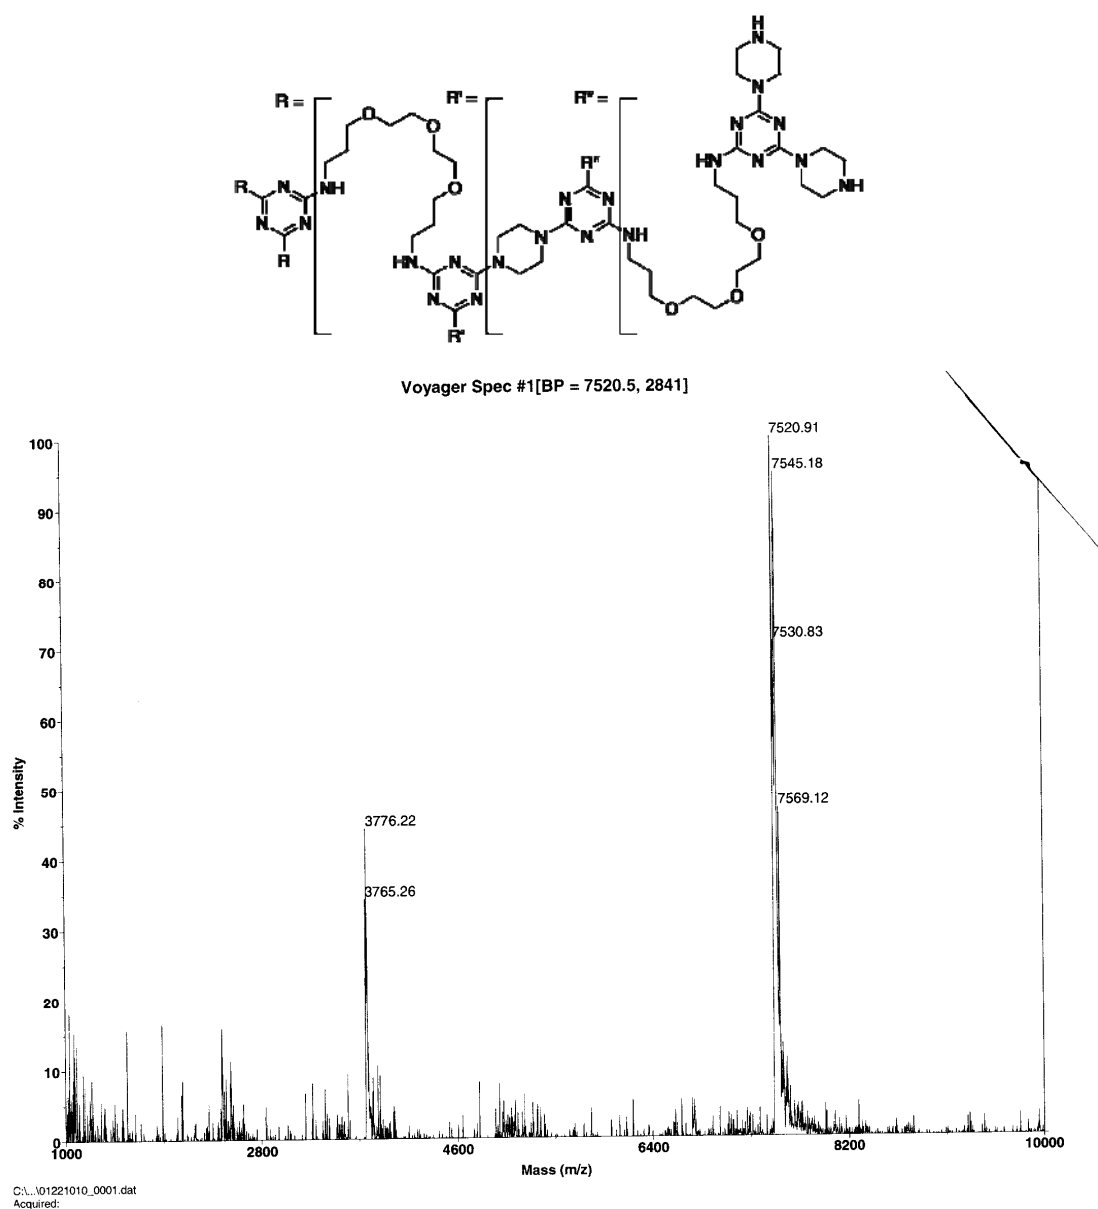

**Figure S18.** MALDI mass spectrum of dendrimer **6**. The doubly charged  $[M + 2H^+]$  is observed with the expected peak at  $m/z \sim 3765$ .

Chemical Formula:  $C_{336}H_{594}N_{156}O_{45} + H^+$

Exact Mass: 7535.9066

Molecular Weight: 7540.3377

$m/z$ : 7538.9167 (100.0%), 7539.9200 (75.7%), 7537.9133 (68.3%), 7540.9234 (34.7%), 7536.9100 (33.1%), 7535.9066 (13.8%)

Error:  $2.3 \times 10^{-3}$ ; 2300 ppm

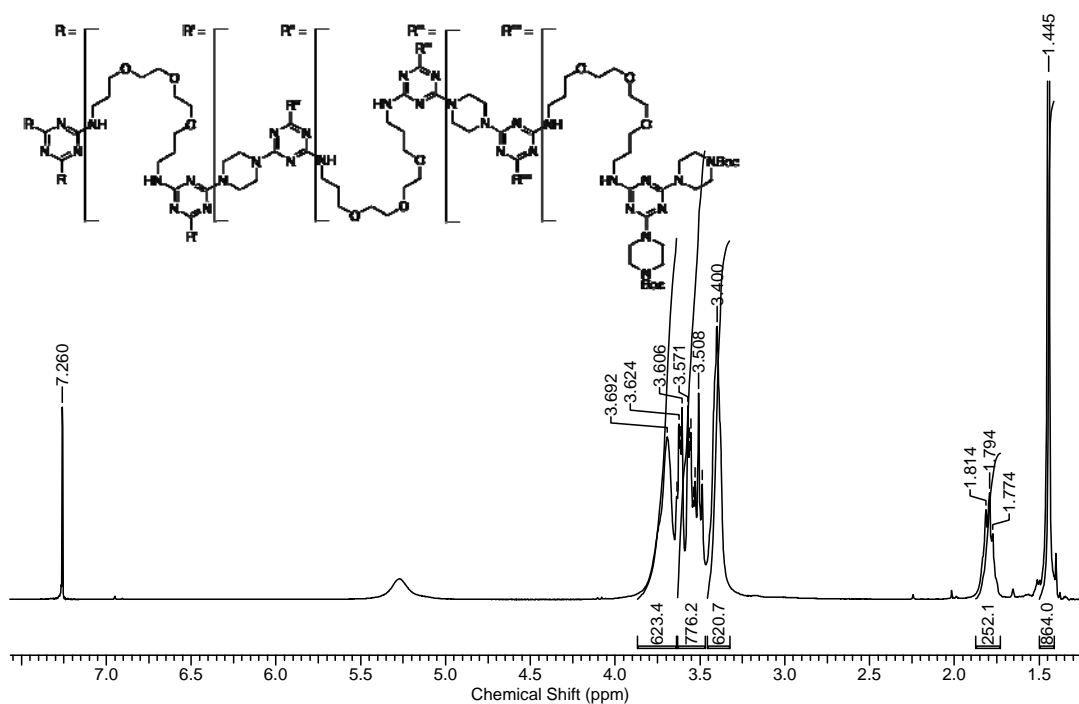

**Figure S19.**  $^1\text{H}$  NMR spectrum of dendrimer **7** (300 MHz,  $\text{CDCl}_3$ ).

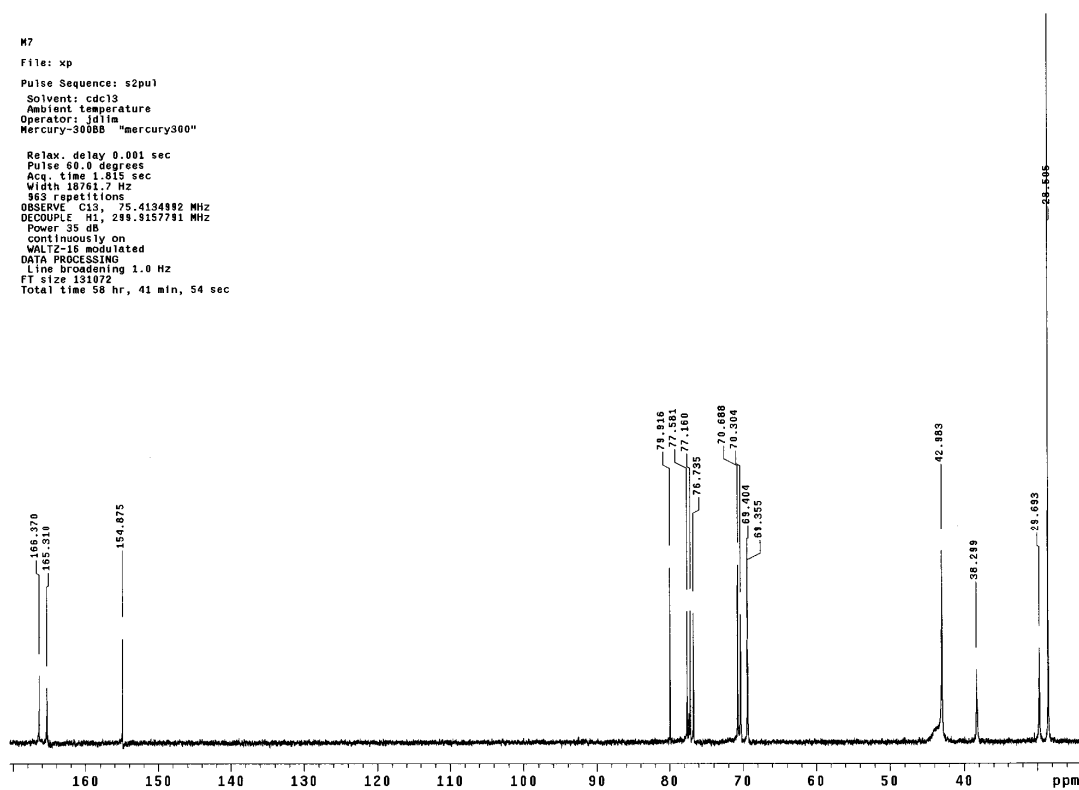

**Figure S20.**  $^{13}\text{C}$  NMR spectrum of dendrimer **7** (75 MHz,  $\text{CDCl}_3$ ).

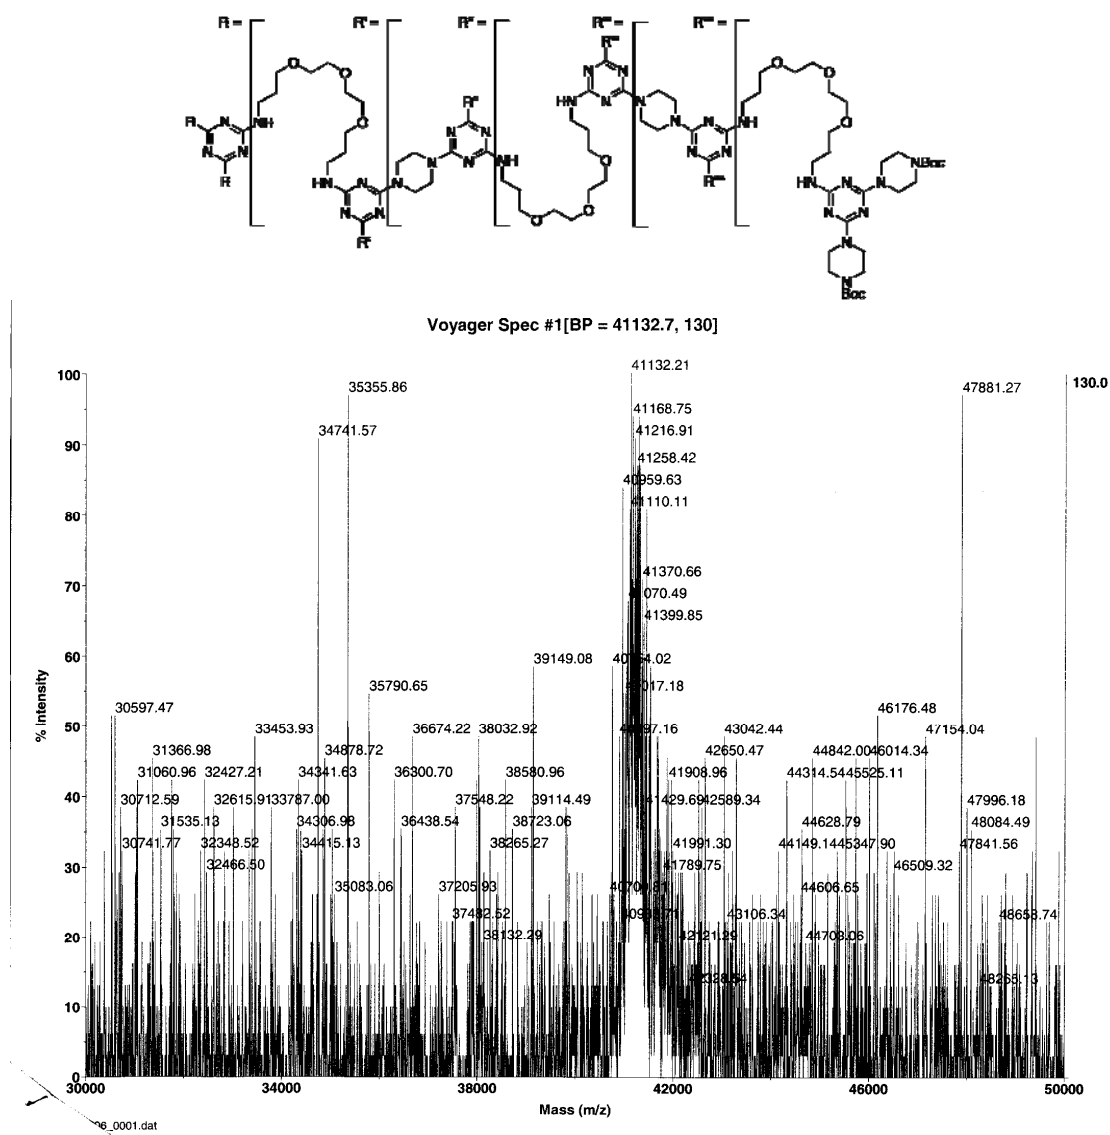

**Figure S21.** MALDI mass spectrum of dendrimer **7**. Obtained at the analytical limits of the instrument, this data is more compelling considering the trace of the incompletely reacted material (next).

Chemical Formula:  $C_{1897}H_{3258}N_{660}O_{381} + H^+$

Exact Mass: 41372.5931

Molecular Weight: 41397.3570

Error:  $2.7 \times 10^{-3}$ ; 2700 ppm

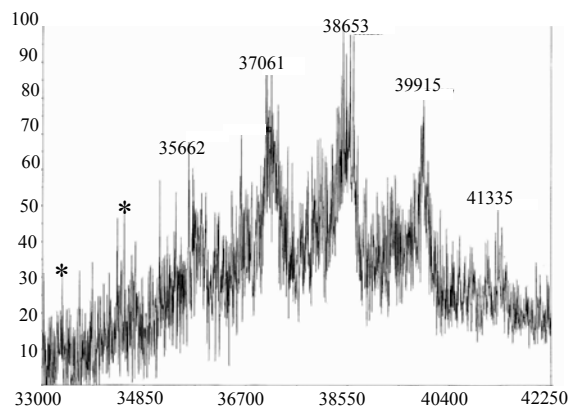

**Figure S22.** Mass spectrum of **7** shows the desired product (m/z 41335) and features corresponding to targets missing 1-4 macromonomers. Additional clues of defects (targets missing 5 and 6 hypermonomers) are indicated with a \*.

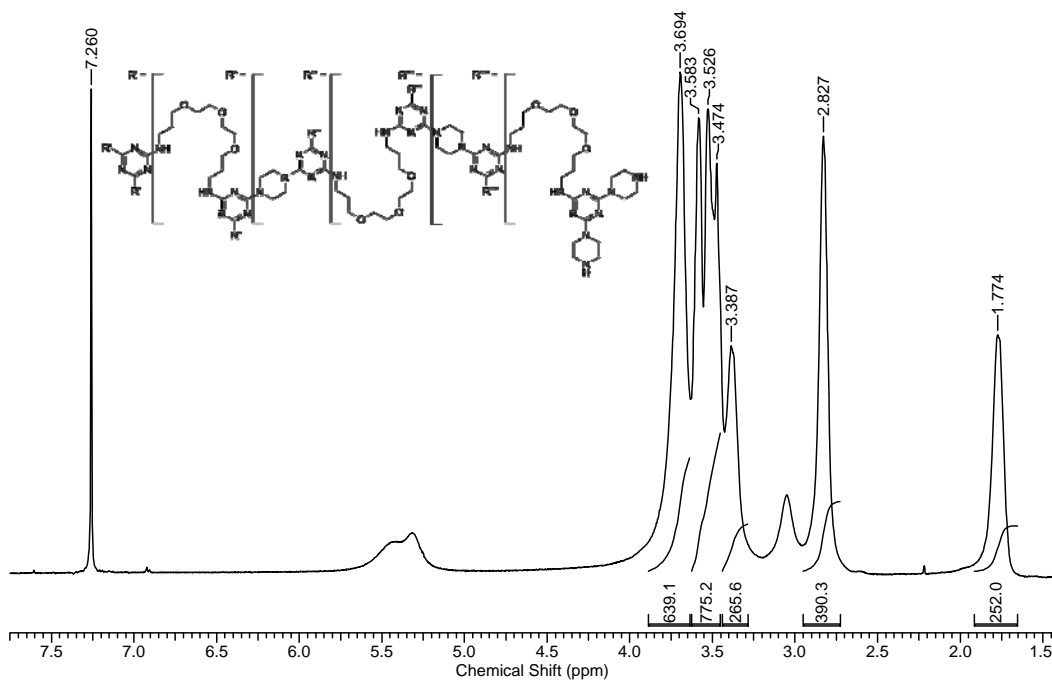

**Figure S23.**  $^1\text{H}$  NMR spectrum of dendrimer **8** (300 MHz,  $\text{CDCl}_3$ ).

M8  
 File: home/simanek/jd1im/M8\_C\_Jan29.fid  
 Pulse Sequence: s2pu1  
 Solvent: cdcl3  
 Ambient temperature  
 Operator: jd1im  
 File: M8\_C\_Jan29  
 Mercury-300BB "mercury300"  
 Relax. delay 0.001 sec  
 Pulse 60.0 degrees  
 Acq. time 1.815 sec  
 Width 18761.7 Hz  
 SFO 500.135035 MHz  
 OBSERVE C13, 75.4135035 MHz  
 DECOUPLE H1, 299.9157791 MHz  
 Power 25 dB  
 continuously on  
 WALTZ-16 modulated  
 DATA PROCESSING  
 Line broadening 1.0 Hz  
 FT size 131072  
 Total time 58 hr, 41 min, 54 sec

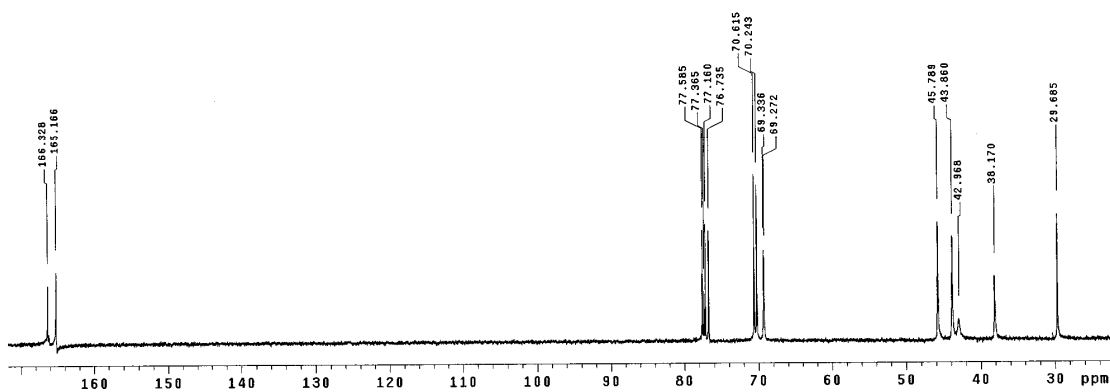

**Figure S24.**  $^{13}\text{C}$  NMR spectrum of dendrimer **8** (75 MHz,  $\text{CDCl}_3$ ).

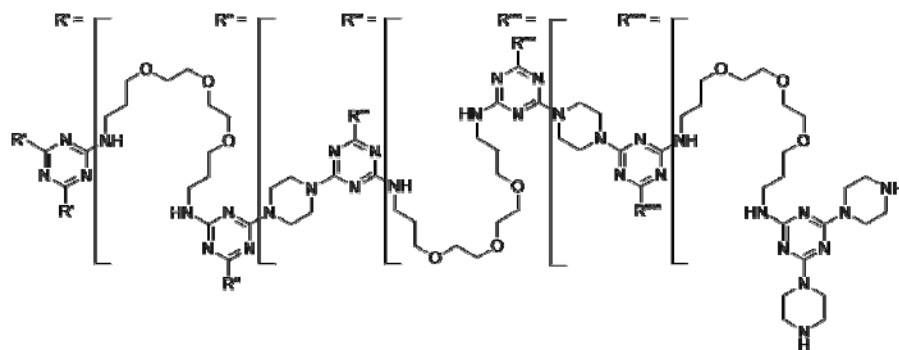

Voyager Spec #1[BP = 15909.7, 3133]

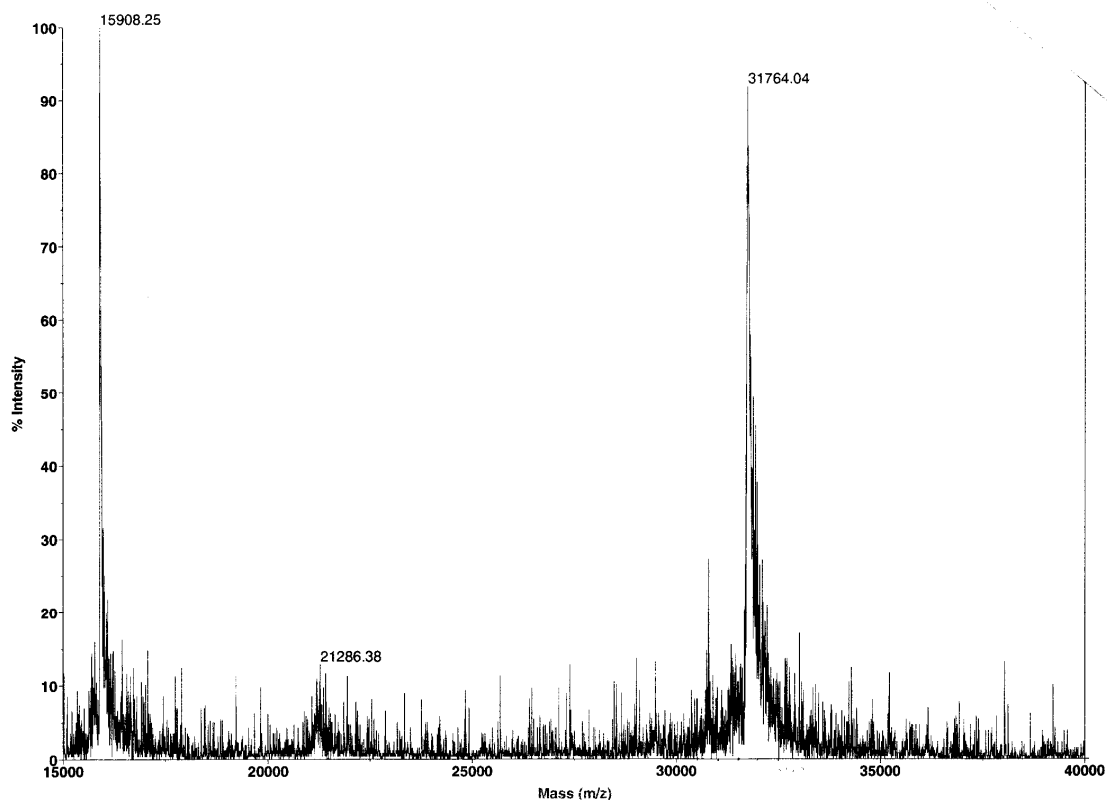

C:\...01291001\_0001.dat  
Acquired:

**Figure S25.** MALDI mass spectrum of dendrimer **8**. The ions of  $[M + 2H]^+$  appears at 15908. The line at 21286 could be attributed to  $[2M + 3H]^+$ , fragmentation or an impurity. We interpret this line presently to be a fragmentation product resulting from cleavage within the hydrophilic diamine linker.

Chemical Formula:  $C_{1416}H_{2490}N_{660}O_{189} + H^+$

Exact Mass: 31767.5599

Molecular Weight: 31786.2383

Error:  $1.1 \times 10^{-4}$ ; 110 ppm
